# Supplementary material
Source: MDPI journal article supplement (https://www.mdpi.com/2504-3900/87/1/16)

# The geosite of travertine waterfall of El ksiba (Morocco), a heritage to enhancement and preserve

AbdellAh AIT BARKA , Jamila Rais , Ahmed BARAKAT , Elhassan LOUZ , Samir NADEM

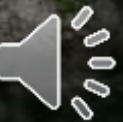



## INTRODUCTION

The study area preserves a great number of karst geosites, such as ruiniform landscapes, caves and many remarkable reliefs such as cliffs and travertines.

This work concerns the quantitative evaluation of Travertines waterfall of El ksiba, and proposition of the strategies of valorization and protection.

The results reveal the high scientific ( $\simeq 0.88$ ) and aesthetic ( $\simeq 0.88$ ) values. The assessment also shows the high economic value ( $\simeq 0.75$ ) and cultral ( $\simeq 0.81$ ).

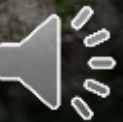



## Study Area

Figure 1. Geological map of study area

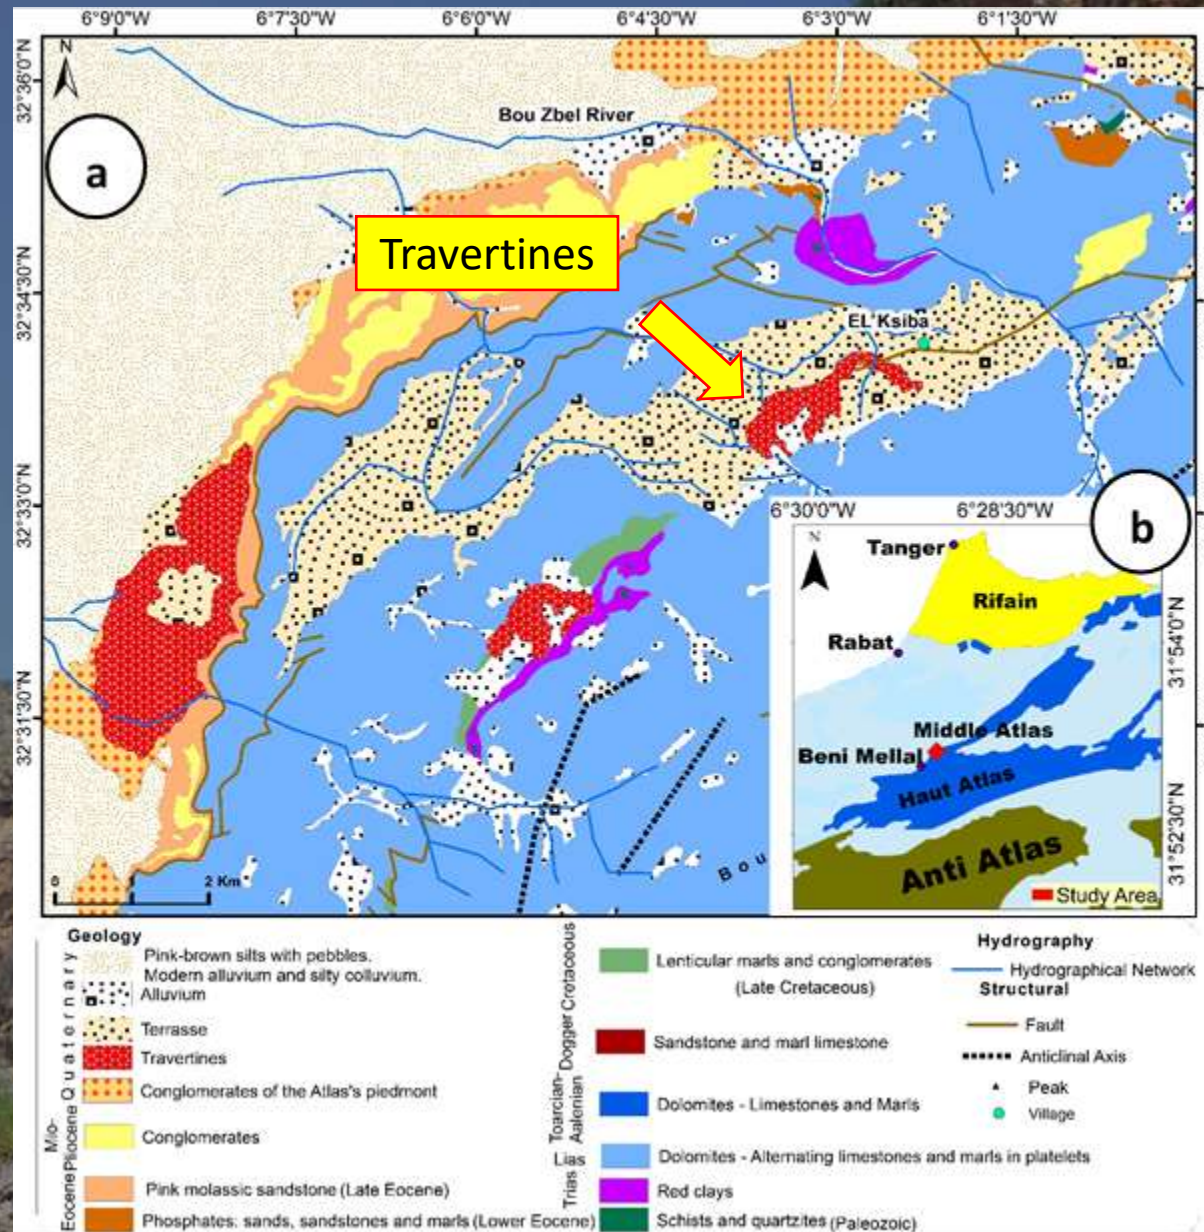



## Materials and Methods

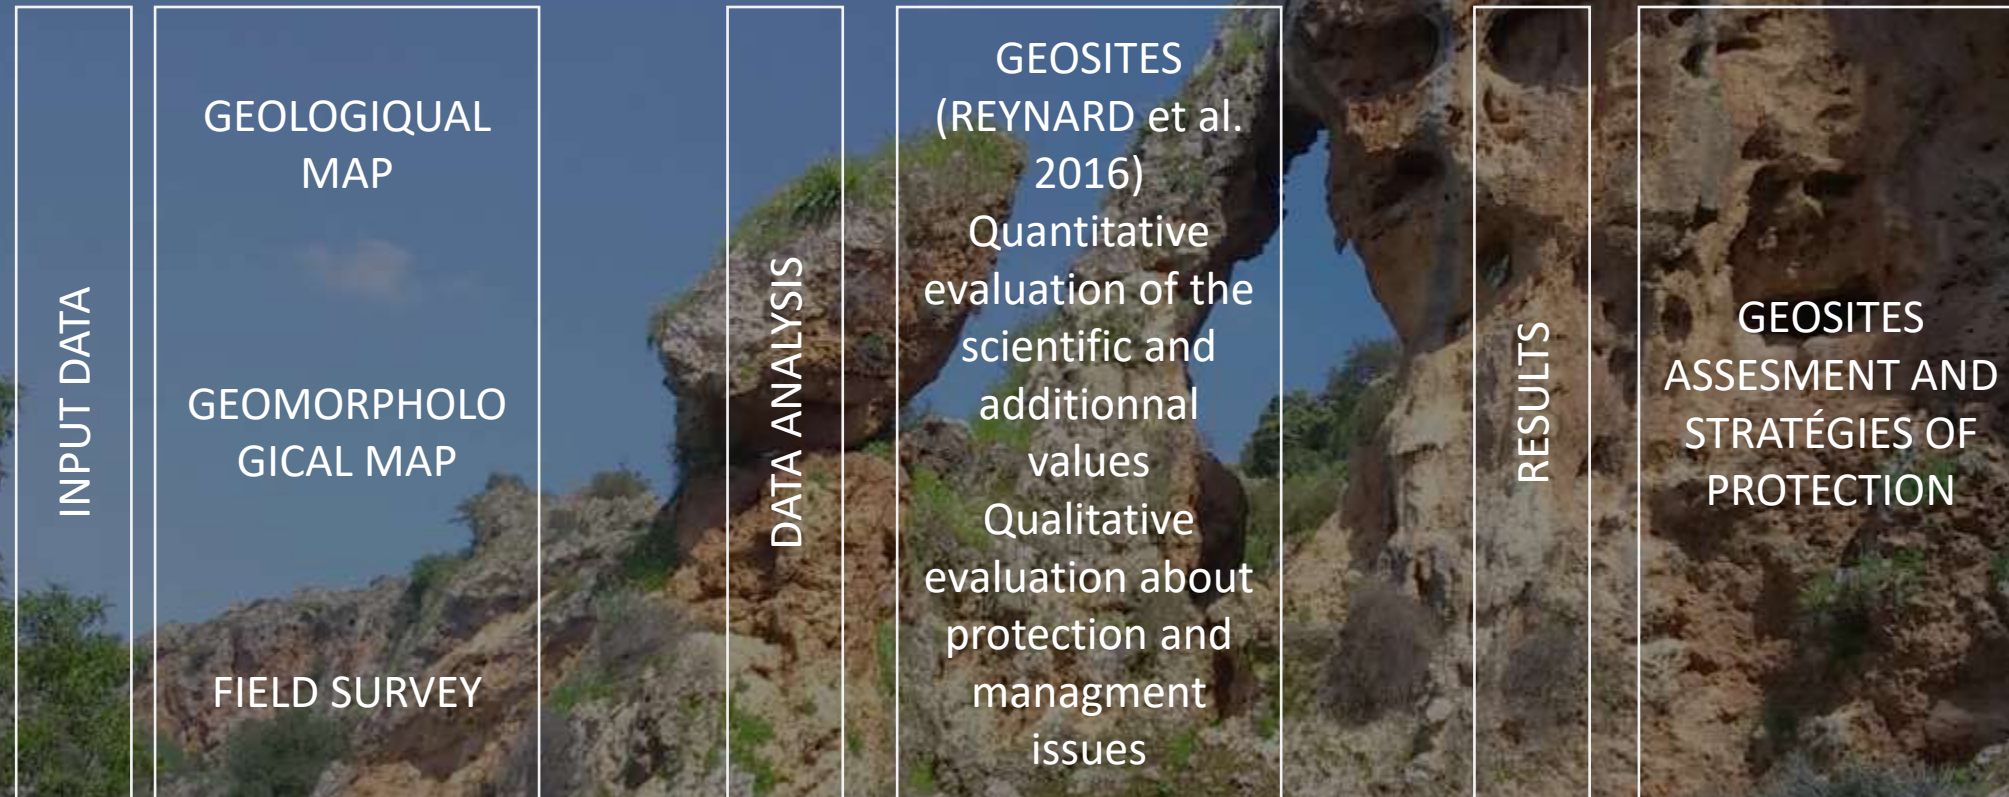

Figure 2. Research methodology flow chart





## RESULTS

Figure 3.

Travertines of El  
ksiba: (a) area  
occupied by  
travertines (google  
earth image,  
october 20, 2022);  
(b) view on the  
travertines; (c)  
ruiniforms  
landscapes; (d) the  
Hyena Cave.

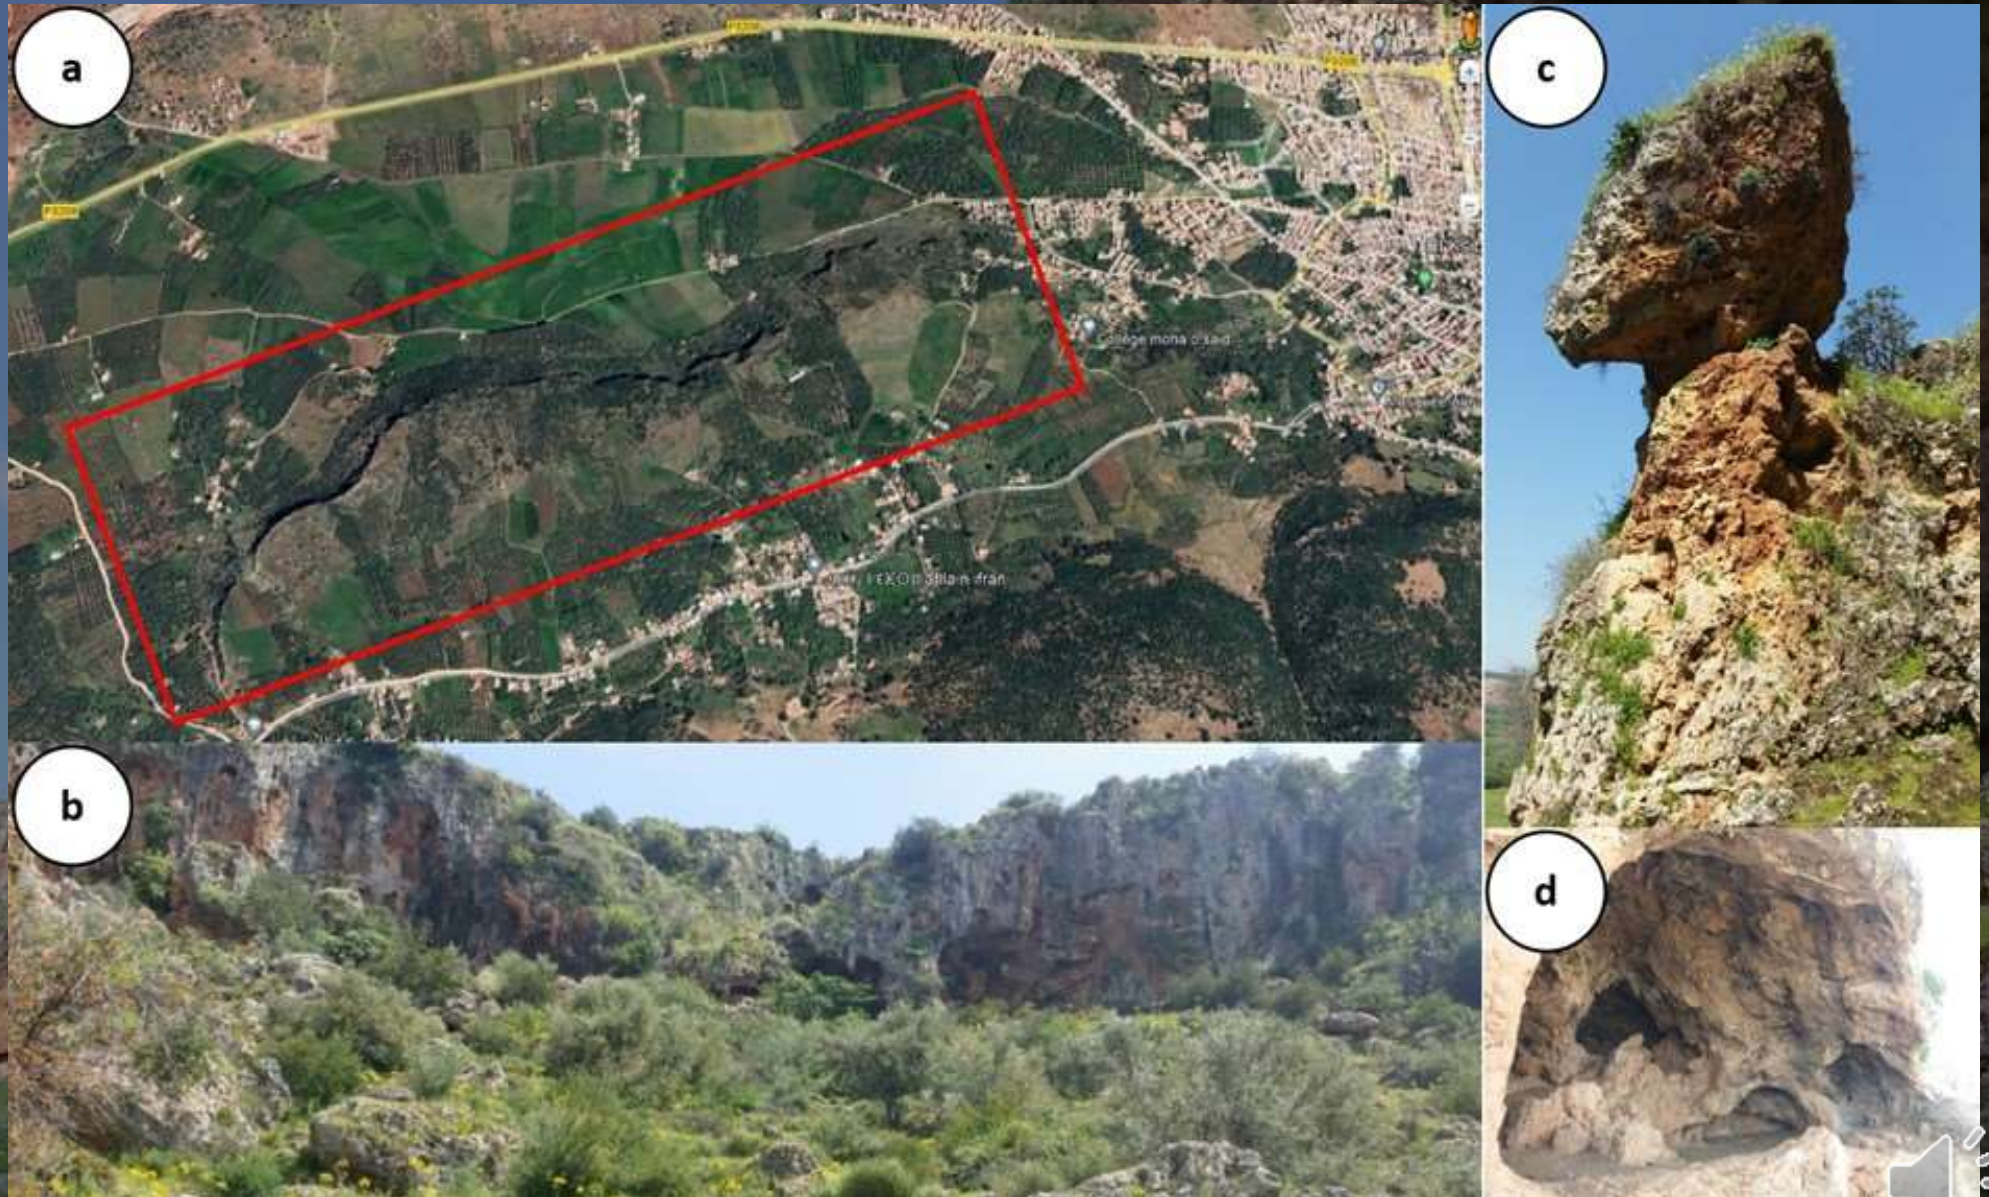



RESULTS

Table 1. Quantitative assessment of the scientific and additional value of El ksiba’s Travertine.

| Code             | Name                  | Scientific value |      |      |      |      | Additional value |      |      |      |       |
|------------------|-----------------------|------------------|------|------|------|------|------------------|------|------|------|-------|
|                  |                       | Int              | Rep  | Rar  | Pal  | Sc V | Ecol             | Aes  | Cul  | Eco  | Ad V  |
| ELKhyd001        | the Hyena Cave        | 1                | 0.75 | 1    | 0.75 | 0.88 | 0.75             | 0.75 | 0.75 | 0.75 | 0.75  |
| ELKkar002        | Spring                | 0.75             | 0.75 | 0.75 | 0.75 | 0.75 | 0.75             | 0.75 | 0.75 | 0.75 | 0.75  |
| ELKhyd003        | Panoramic view        | 1                | 1    | 0.75 | 1    | 0.94 | 1                | 1    | 1    | 0.75 | 0.94  |
| ELKkar004        | ruiniforms landscapes | 0.75             | 1    | 1    | 1    | 0.94 | 0.75             | 1    | 0.75 | 0.75 | 0.812 |
| Travertine Value |                       | 0.75             | 0.88 | 0.75 | 0.63 | 0.88 | 0.81             | 0.88 | 0.81 | 0.75 | 0.81  |

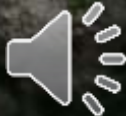



## CONCLUSION

The quantitative evaluation shows that the travertines of El ksiba have an important scientific value (0.88); it presents an open-air museum rich in paleontological, speleological and paleoclimatic data which helps us to reconstruct the old environment.

We proposed to popularize this geological phenomena by the Geoeducation.

Geotourism appears as the main component of the socio-economic development of the region, it aims to promote its geological and geomorphological wealth. It contributes to socio-economic development through the creation of new income-generating activities (ecological guest houses, traditional handicrafts, local natural products,...).



Supplement: s1 [file s1]
